# Supplementary material
Source: MDPI journal article supplement (https://www.mdpi.com/2073-4395/12/12/2967)
Supplement: s1 [file s1 › Supplementary Tables.xlsx]

## Sheet: Table S1 RS content
Table S1. Varieties used in the present study and the RS content under three locations.
Variety Name	Origination	Locations									Average
		Shangqiu			Kaifeng			Yuanyang
Changwu135	Shaanxi-China	5.46779	5.24066	5.44203	5.01132	4.80688	5.10358	5.19581	5.50321	5.10271	5.20822
Shan229	Shaanxi-China	5.93787	6.0966	5.90472	5.33284	5.2432	5.45396	5.33183	5.49253	5.19501	5.55428
Xiaoyan6hao	Shaanxi-China	5.60254	5.73388	4.90835	5.35926	5.3601	4.5997	4.646	4.9555	4.60127	5.08518
Lantian10hao	Gansu-China	4.9663	5.39699	5.20388	4.66959	4.9222	5.00232	5.21169	5.29769	5.00005	5.07452
Luohan3hao	Henan-China	5.21543	5.61623	5.59949	5.30844	5.86675	5.09731	5.07999	5.25917	5.20268	5.36061
Jing411	Beijing-China	5.44352	5.99245	5.55191	5.82816	5.61743	5.25399	5.44976	5.05956	4.92431	5.4579
Ningdong1hao	Ningxia-China	5.88995	5.49356	5.85565	5.30418	5.46792	5.68869	5.05969	4.79151	5.28342	5.42606
Mianyang11	Sichuan-China	5.93027	5.64995	5.76071	4.78666	4.79457	4.45606	5.31434	5.17656	5.20027	5.22993
Taishan5hao	Shandong-China	5.93181	5.84112	5.84112	6.53374	6.49651	5.72916	6.51956	6.17549	6.32365	6.15468
Xinmai13hao	Henan-China	6.45262	5.97163	6.41479	5.57122	5.39701	5.01545	5.28806	4.73755	5.51408	5.59582
Xinmai18hao	Henan-China	5.88995	5.83678	5.76873	4.95898	5.28528	4.94677	5.20763	5.07129	4.85364	5.31323
Zhoumai16hao	Henan-China	4.30203	4.70509	4.56337	4.99612	4.63989	4.64776	5.30557	4.8986	5.37531	4.82597
Yuanfeng139	Shaanxi-China	5.6417	5.57593	5.90539	4.15829	4.2668	4.83753	4.81794	4.78273	4.95146	4.99309
Fengchan3hao	Guizhou-China	5.31786	5.77637	5.93428	4.9419	4.60891	4.75304	5.13536	4.93811	4.97918	5.15389
Zhongyu8hao	Henan-China	4.33773	4.46008	4.52481	5.41654	5.45382	4.67352	5.04217	4.91547	5.27053	4.89941
Bainong160	Henan-China	5.99202	5.58002	6.11021	4.46063	4.56335	4.85658	4.76883	4.92957	5.44144	5.18918
Luomai21hao	Henan-China	4.67828	4.58662	4.82003	5.34339	4.55511	5.20299	5.46895	5.1165	5.25439	5.00292
YanZhan4110	Henan-China	5.23407	5.12862	5.33942	5.38478	5.5465	5.2957	5.59167	5.59931	5.5743	5.41049
Han6172	Hebei-China	5.63864	5.58959	5.08805	5.87734	5.8024	5.49039	5.11523	4.98652	4.70085	5.36545
Huaimai21	Jiangsu-China	5.71471	5.64927	5.25483	5.8791	7.06826	6.55837	5.65013	4.92476	5.43302	5.7925
Mianyang26	Sichuan-China	5.60449	5.26392	5.78441	4.87982	4.86654	4.91166	4.4095	5.11906	4.93725	5.08629
Lunxuan715	Beijing-China	5.52159	5.39531	5.72979	5.44393	5.43943	5.68954	5.17005	5.09406	4.82184	5.36728
Youpi1hao	Bulgaria	5.60063	5.75332	5.28229	5.83433	6.40557	5.26766	5.7024	5.70345	5.81075	5.70671
Xifeng9hao	Gansu-China	5.59751	5.45666	5.51381	4.93809	5.19785	4.91231	5.15583	5.19997	5.29557	5.25196
Nongda198	Beijing-China	4.77779	4.84675	5.06764	4.84697	5.55144	5.20335	5.1897	5.00087	5.22194	5.0785
Kedong81	Hebei-China	5.89939	5.84996	5.28894	4.864	4.74938	4.90119	5.6354	4.76543	5.13755	5.23236
Linfen10hao	Shanxi-China	5.35966	5.34657	5.55574	4.31985	4.34369	4.0931	4.44701	4.53591	4.56975	4.73014
Fengkang5hao	Beijing-China	5.79389	6.06162	5.37318	5.53153	5.43068	5.39879	5.10395	5.08115	4.89152	5.40737
Changfeng1hao	Henan-China	5.36964	5.72785	5.60905	4.64641	4.87678	4.45762	4.91979	4.50619	4.90354	5.00187
Jingdong1hao	Beijing-China	5.8819	6.00528	5.52571	5.50703	5.14047	5.12369	4.82608	5.02398	5.13366	5.35198
Jinmai21	Shanxi-China	5.42472	5.96868	5.30349	4.90657	5.01072	4.95041	4.44693	4.40366	5.03194	5.04968
Jimai23	Hebei-China	5.20113	5.21681	5.78965	5.15707	4.65444	5.04584	4.32459	4.54275	4.83608	4.97426
Hanxuan10hao	Shanxi-China	6.15585	5.88106	5.24397	5.75794	5.86209	5.28448	5.00678	5.02299	5.3003	5.50172
Xianshixinmai	Shaanxi-China	4.6128	4.50891	4.46307	4.91057	4.9636	5.08711	4.67194	4.8437	4.84373	4.76727
Chixiaomai	Shaanxi-China	5.48205	4.98792	5.06276	4.83386	5.64939	5.18629	4.80459	4.96515	5.38564	5.15085
Bima1hao	Shaanxi-China	4.68931	5.40876	4.81664	4.91878	5.57584	5.66293	4.71412	4.8626	4.82271	5.05241
Aimengniu	Shandong-China	5.44369	5.21715	5.0694	5.5334	5.8783	5.30558	4.34731	4.56764	4.39228	5.08386
Wenmai6hao	Henan-China	5.47911	5.65665	5.3655	5.68229	5.03696	5.04391	4.76876	4.83438	4.55034	5.15754
MazhaMai	Henan-China	5.34976	5.67874	5.1247	5.06218	4.98345	5.28384	4.84458	4.60756	5.03178	5.1074
Dayuhua	Shaanxi-China	4.13572	4.33633	4.35309	5.24378	5.0567	5.37045	4.72916	4.26351	4.96651	4.71725
Chushanbao	Henan-China	4.83301	4.70759	5.05345	5.21387	4.91373	5.09323	4.98509	4.85462	5.21986	4.98605
Dalibanmang	Henan-China	5.10258	4.78595	5.37566	4.77158	4.74487	4.74207	4.81939	4.42372	4.64308	4.82321
Baimazha	Shaanxi-China	5.62233	5.44604	5.98938	5.08941	5.28302	4.98183	4.77061	4.12978	4.81708	5.1255
Ganmai8hao	Gansu-China	5.86751	6.00091	5.35316	5.14416	5.51721	5.48308	4.9605	5.30696	5.10307	5.41518
Yunmai34hao	Yunnan-China	5.39884	5.39558	6.13881	4.89807	4.58982	5.06209	4.81263	4.32294	4.66457	5.03148
Wuyimai	Yunnan-China	5.80293	5.8585	5.23207	5.26213	5.69645	5.45628	5.50479	5.30207	5.31012	5.4917
Nanda2419	Jiangsu-China	5.40917	5.48828	5.08814	4.93766	4.57228	5.07313	5.15101	5.32722	5.12859	5.13061
Nonglin10hao	Japan	4.64638	4.26541	4.14377	5.2156	5.22003	5.1814	5.03118	5.12324	5.12492	4.88355
Hanyangmai	Shaanxi-China	6.16707	6.07583	5.97664	5.43313	5.73211	5.58283	6.01874	5.59873	5.72622	5.81237
Luofulin10hao	Russian	4.83738	4.98382	5.09636	5.0078	4.77981	4.6809	5.39007	5.32258	5.42977	5.05872
Aifeng3hao	Shaanxi-China	5.40292	5.32625	5.44461	4.44078	4.43842	4.29648	4.63536	4.42826	4.43496	4.76089
Yunhan618	Shanxi-China	5.04458	5.18767	5.53876	4.65403	4.71605	4.55104	5.25765	5.03333	4.98798	4.99679
Yannong21	Shandong-China	4.45376	4.90592	4.6874	4.85881	4.76183	4.90997	5.12302	5.22318	5.40153	4.92505
Jinmai47	Shanxi-China	4.98395	4.90014	4.85496	5.30513	5.09596	5.17949	5.55303	5.39042	5.44229	5.18949
Changwu58	Shaanxi-China	6.24608	5.72171	5.63371	4.45486	4.86774	4.64178	4.29911	4.73815	4.90835	5.05683
Zhenghan1hao	Henan-China	5.82298	5.44662	5.78726	4.75296	4.53055	4.80946	4.93049	4.77509	4.80354	5.07322
Chang6878	Shanxi-China	5.54158	5.58653	5.90526	5.00464	4.85761	4.46566	4.91447	4.92422	5.09104	5.14345
Luohan1hao	Henan-China	5.74249	5.4176	5.37619	4.884	4.62924	5.0676	4.55465	4.57454	4.9058	5.0169
Luohan6hao	Henan-China	5.49672	5.5636	5.55864	4.7928	5.10419	4.99381	5.09801	4.93547	4.54086	5.12046
Luohan11hao	Henan-China	5.20573	5.3631	5.68414	4.84992	5.27758	4.75933	5.11523	4.76799	4.81682	5.09332
PuXing5hao	Henan-China	6.09021	5.61479	5.70384	5.51128	5.4939	5.46908	4.848	4.6479	4.79369	5.35252
Ruiquanmai24	Henan-China	5.57325	5.55314	5.76764	4.97532	5.01625	5.08387	4.75345	4.8188	4.51044	5.11691
Dehongfu2hao	Henan-China	5.33032	5.36467	5.16102	4.97023	5.22126	4.89609	4.74752	4.71746	4.59802	5.00073
Zhongmai895	Beijing-China	5.38064	5.2229	4.98963	4.72005	4.71709	4.8446	4.97728	4.50796	4.5306	4.87675
Huaimai35	Jiangsu-China	5.47394	5.39721	5.46611	5.76282	5.17389	5.84202	4.62678	4.23796	4.6739	5.18385
Longpingmai518	Henan-China	5.82482	5.53899	5.70063	6.14131	6.45241	6.32835	4.59538	4.81711	4.8793	5.58648
Huaimai30	Jiangsu-China	4.271	4.71549	4.50949	5.20911	5.13984	5.14455	5.07856	5.03022	5.12454	4.91364
Zhongyuan6hao	Henan-China	6.36784	5.88411	5.81626	6.66833	6.10174	5.95433	5.16834	5.2091	5.49228	5.85137
Pingan8hao	Henan-China	6.24298	6.03629	6.16635	5.44837	6.00717	5.82474	4.77034	5.03715	5.01289	5.61625
Bainong207	Henan-China	5.55399	5.55242	5.25439	4.85599	4.87552	4.92593	4.87995	4.91135	4.95338	5.08477
Cun1hao	Henan-China	6.01155	5.72792	6.11233	4.73272	4.91039	4.48704	4.516	4.97989	4.84545	5.14703
Zhoumai26	Henan-China	6.31457	6.18055	6.1653	5.31747	5.93578	5.77914	4.31197	4.35194	4.42265	5.41993
LuoMai18	Henan-China	6.05605	6.19504	5.69098	3.74504	4.30281	4.12019	4.69605	5.33091	4.98423	5.01348
Baofeng10-82	Jiangsu-China	6.05107	6.13087	6.22983	4.05045	4.17064	4.58064	5.34427	5.24773	5.44399	5.24994
Su553	Anhui-China	5.58246	5.34288	5.59359	4.20514	3.84654	3.85095	4.45552	4.01416	3.98671	4.542
09N37	Gansu-China	6.03834	5.71491	6.05284	4.63314	4.65639	4.94306	5.06467	4.96798	5.45575	5.28079
Guinong17	Guizhou-China	5.69725	6.04641	5.55362	3.86846	4.15607	4.52618	5.11061	5.28065	5.08788	5.03635
Hengguan35	Hebei-China	5.78094	5.63891	5.66364	4.35217	4.53249	4.05168	4.87104	4.51114	5.16171	4.95153
Yumai18	Henan-China	5.2234	5.3454	5.51147	4.21903	4.28447	4.6259	4.68846	4.49087	4.48072	4.7633
Yumai13	Henan-China	5.76873	5.81773	6.02964	4.05425	4.25151	4.63756	5.97793	5.84814	6.23415	5.40218
Yumai47	Henan-China	5.65763	5.78024	5.81384	4.27612	4.15276	4.69591	4.95174	5.19058	5.55783	5.11963
Zhengmai004	Henan-China	5.86365	5.73667	5.94129	4.36819	4.5993	4.59872	3.95212	4.15892	4.48661	4.85616
Yumai50	Henan-China	5.87631	5.99194	5.73522	5.17583	4.98421	4.89938	5.97476	5.63816	5.91525	5.57678
Taikong6hao	Henan-China	5.12357	5.22839	5.01717	4.0333	4.10822	4.21821	5.42208	6.06975	5.93882	5.01772
Huapei5hao	Henan-China	5.51333	5.52193	5.73587	5.21726	5.09669	4.56248	5.08872	5.13196	4.8387	5.18966
Hua9987	Henan-China	5.16522	5.4783	5.14123	5.08714	5.434	5.18358	5.25694	5.43629	5.4911	5.29709
Yujiao5hao	Henan-China	4.83377	5.40768	5.43285	5.86929	5.86117	5.9002	5.85165	5.56597	5.94986	5.63027
Yunong416	Henan-China	5.71907	5.78106	6.09954	4.70113	5.0721	5.11565	5.38301	5.3364	5.23029	5.38203
Bainong64	Henan-China	5.51066	5.66348	5.55535	4.31547	4.79695	4.82239	4.21778	4.15727	4.3681	4.82305
Zhoumai9hao	Henan-China	5.10865	5.65012	5.43233	4.44293	5.11657	4.6046	5.53161	5.32807	5.20072	5.15729
Zhoumai13	Henan-China	5.50666	5.52689	5.18456	4.72026	5.21832	5.08003	4.73783	5.12469	5.50367	5.1781
Zhoumai8425B	Henan-China	4.81859	5.30328	5.11153	4.27252	4.36972	4.14781	4.72222	5.31171	5.17059	4.80311
Kaimai21	Henan-China	6.00403	5.42884	5.4736	4.53656	4.96945	4.59075	5.21528	4.95039	5.25722	5.15846
LuoZhen1hao	Henan-China	5.37195	5.40798	5.15976	4.49188	4.91286	4.77352	4.2816	4.36245	4.11307	4.76389
Neixiang188	Henan-China	5.46962	5.55646	5.87684	5.23007	5.19485	5.25067	5.67525	5.56116	5.88737	5.52248
Aiyou26-2	Henan-China	5.51145	5.47162	5.37611	4.6138	4.99169	4.60653	5.37463	5.06384	5.18811	5.13309
Changgeheili	Henan-China	5.07296	5.10865	5.32837	4.44042	4.36656	4.77664	4.92463	5.00939	5.06701	4.8994
Lvmai1hao	Shandong-China	5.56334	5.80971	6.11177	5.29695	5.33267	4.59888	5.4662	5.55424	5.96531	5.52212
Subeimai1hao	Jiangsu-China	5.97671	5.35327	5.31544	5.13523	5.26697	5.37423	5.37309	5.60812	5.46978	5.43031
Jinan17	Shandong-China	5.34304	5.28729	5.16751	4.82352	5.51614	4.81833	5.01549	5.49089	5.03649	5.16652
Jimai20	Shandong-China	5.34225	5.64122	5.15005	4.72916	4.82425	4.53044	4.95937	4.85903	4.95256	4.99871
Shan225	Henan-China	5.70441	5.56658	5.73783	5.42166	5.13588	5.55628	5.08451	5.22104	5.24759	5.40842
Xinong979	Shaanxi-China	5.4737	5.64085	5.80047	5.01991	5.35267	5.3341	5.78153	6.04485	6.29744	5.63839
Aobaxter	Australia	5.26042	5.03409	4.86063	4.73299	5.00584	4.76563	5.80214	5.8057	6.01644	5.25376
Aocd87	Australia	4.95302	4.98874	5.23423	4.74653	5.44965	5.30891	6.34133	5.91213	6.05034	5.44276
Aokukri	Australia	4.87959	5.21949	4.8648	4.54574	4.79907	4.33246	5.11011	5.72067	5.77153	5.02705
Faguomai	France	5.58891	5.67123	5.20996	4.92431	4.98665	4.83169	5.86301	5.70702	6.05002	5.42587
Belero	France	5.5741	5.54487	5.46947	5.05341	5.21218	5.70077	5.67883	6.50198	5.82447	5.61779
Fundulea900	Romania	5.55037	5.49823	5.37798	4.85057	4.91599	4.82438	5.84071	6.06405	6.05308	5.44171
Tincurrin	Mexico	5.43306	5.30013	5.41731	5.09552	5.11588	5.45383	5.16821	5.34196	5.34891	5.2972
H149	Henan-China	5.29972	5.19487	5.3828	5.20683	5.18201	4.92116	6.22226	5.92383	6.11893	5.49471
Fab08	France	5.13377	5.10672	4.8044	3.85589	3.99787	4.24347	5.30111	5.36322	4.93695	4.74927
Fab20	France	5.19702	5.0511	5.17482	4.21723	4.02821	4.09965	5.7774	5.62386	5.38647	4.95064
Bainong416	Henan-China	5.36396	5.76435	5.42988	4.59762	4.72618	4.22313	5.71691	5.96891	5.58806	5.26433
Luo31	Henan-China	6.35367	6.91027	6.51589	4.24462	4.38155	4.45972	4.88579	4.82794	5.52032	5.34442
Taihemai1hao	Henan-China	5.67415	6.3184	6.48065	4.70221	5.35831	4.86398	4.98548	5.00488	5.30795	5.41067
Junmai35	Henan-China	6.09735	5.42729	5.52011	4.65842	4.81552	4.27227	5.63077	4.83254	5.31777	5.17467
Luomai23	Henan-China	5.88812	5.85253	5.67184	4.49574	4.72933	4.74386	5.69994	5.79801	6.05165	5.43678
Jiaomai266	Henan-China	4.44706	4.3099	4.21652	4.32019	4.58636	4.69933	4.67224	4.63694	4.46868	4.48413
WenNong14hao	Shandong-China	6.10143	5.05341	5.53167	4.71206	5.13778	5.00372	5.68234	5.56113	5.66953	5.38367
Jimai22	Shandong-China	6.04624	6.04413	5.89599	4.61076	4.71125	4.63908	5.24033	5.16597	5.90021	5.36155
Ningmai9hao	Jiangsu-China	5.50489	5.08522	4.54007	4.06895	4.33598	4.47227	5.06211	5.29115	5.22445	4.84279
10Ew28	Jiangsu-China	6.47552	5.99619	6.84016	5.20368	4.79445	4.91598	4.84298	5.29331	5.42904	5.53237
10Ew137	Jiangsu-China	4.9667	5.03775	4.94931	4.40974	4.71241	4.2146	5.35394	5.21583	5.60535	4.94063
Zhou18	Henan-China	3.79031	4.42461	4.28252	4.73253	4.68221	5.18021	5.38244	5.13398	4.99486	4.73374
04Zhong38	Henan-China	5.04863	5.55634	5.63403	4.50713	4.34337	4.7032	4.99239	5.35899	5.38277	5.05854
Yumai34-9901	Henan-China	5.82833	5.94011	5.45865	3.9778	4.28149	4.42414	4.21809	4.5107	4.50343	4.79364
Zheng9023-8	Henan-China	6.582	6.66061	6.84679	4.38697	4.38633	4.49334	5.11254	4.88774	4.63557	5.33243
Zheng103	Henan-China	5.58142	5.66943	5.83699	4.73106	4.49347	4.67061	4.21094	4.2999	4.33617	4.87
Aocalingiri	Australia	5.40409	5.84042	5.56136	4.06646	4.13917	4.12991	4.37163	4.67251	4.0169	4.68916
Zhengmai366	Henan-China	5.61176	5.28633	5.24572	3.96604	3.89598	3.77525	3.96405	3.87061	3.89595	4.39019
Zhengmai7698	Henan-China	5.84393	5.78356	5.79209	5.04767	5.0278	4.97146	4.74228	4.57951	4.41911	5.13416
Zhoumai22	Henan-China	6.19845	6.27733	6.08068	5.10836	5.14976	4.87449	5.26663	4.83957	5.24364	5.44877
Zhoumai27	Henan-China	6.10225	5.98488	5.86867	4.71931	4.52114	4.60896	4.99382	4.59035	4.45013	5.09328
Zhoumai30	Henan-China	6.33967	6.32741	6.25863	4.77328	4.82109	4.75421	4.77413	4.75602	4.48165	5.25401
Zhoumai32	Henan-China	5.82133	5.74403	5.88743	4.99391	4.80887	4.43089	4.3871	4.33196	4.4266	4.98135
Liangxing66	Shandong-China	5.88393	5.81608	5.88891	4.85073	4.59446	4.53948	4.72755	4.55171	4.05737	4.99002
Dongmai25	Hubei-China	5.97351	6.16581	5.99825	4.37932	4.42692	4.71694	4.79347	4.9642	4.6955	5.12377
Ningchun5hao	Ningxia-China	6.07401	6.62953	6.43436	5.3645	4.9749	4.49619	4.32267	4.65899	4.45808	5.26814
Shannong33	Shaanxi-China	5.47372	5.52352	5.63293	4.30999	4.36127	4.50365	4.21816	4.05036	4.32168	4.71059
Zhongmai175	Beijing-China	6.45372	6.0722	6.86003	4.89914	4.87778	4.96292	4.70552	4.98831	4.8745	5.41046
GaoCheng8901	Hebei-China	5.55188	5.54378	5.66994	4.51633	4.78265	4.55858	4.4885	4.08304	3.70553	4.76669
Shannongtedali1hao	Shandong-China	5.13267	5.07026	4.83633	4.75556	5.03854	4.89302	4.73257	4.4683	4.13225	4.78439
Changmai9hao	Sichuan-China	6.16847	6.1932	6.02983	4.65568	4.33934	4.6175	4.36379	4.65795	4.31875	5.03828
Yangfumai2hao	Jiangsu-China	5.8438	6.05531	5.86531	4.62473	4.5882	4.55407	4.40947	4.31543	4.04014	4.92183
Wanmai53	Anhui-China	5.79309	5.87692	5.61752	4.7034	4.64773	4.88141	4.54023	4.3333	4.53757	4.99235
Fanmai8hao	Henan-China	4.46787	5.09078	4.76801	4.42591	4.28728	4.22915	4.69361	4.76059	4.52119	4.58271
Yunmai51	Yunnan-China	6.77783	7.32876	7.35815	5.13001	5.07806	4.79287	4.73196	4.50649	4.66637	5.59672
Yunmai53	Yunnan-China	5.97658	6.16012	6.82269	4.7	4.42673	4.3349	3.94934	3.98329	3.46806	4.86908
Yunmai47	Yunnan-China	6.2529	6.27227	5.96494	5.05153	4.5413	4.26542	4.45631	4.47667	4.81766	5.12211
Xinong928	Shaanxi-China	6.412	6.28028	6.59357	5.00154	5.12191	5.26508	4.85878	4.39246	4.85476	5.42004
Xinmai26	Henan-China	6.69423	6.60718	6.57895	4.89257	5.02511	5.24075	5.18979	4.43883	5.06704	5.52605
Wanmai47	Anhui-China	6.25992	6.09677	6.05872	4.88925	5.15569	4.8458	4.60562	4.3857	4.72286	5.22448
Yangmai13	Jiangsu-China	7.11786	6.33701	6.94984	4.50449	4.70275	4.62291	4.53121	4.83465	4.61543	5.35735
GaoYou2018	Hebei-China	6.32542	6.27692	6.50297	4.88589	4.54396	4.67803	4.29332	4.58214	4.34009	5.15875
GaoYou9415	Hebei-China	4.83611	4.40221	4.65182	4.86415	4.68625	4.82165	4.33785	4.55811	4.21257	4.59675
Shiluan02-1	Hebei-China	7.28606	7.32681	7.22807	5.34531	5.30348	5.41788	4.5168	4.81112	4.92608	5.79574
Zheng1005	Henan-China	6.78087	6.75423	6.87803	4.65565	4.70816	4.82846	4.76388	4.65375	4.87379	5.43298
Zheng1105	Henan-China	4.70305	5.2204	4.97398	4.68678	4.79009	4.82115	5.16819	5.12964	5.05897	4.95025
Zheng1118	Henan-China	4.42031	4.19977	4.21709	4.40699	4.57099	4.61717	4.84997	4.46756	4.84689	4.51075
Zheng1289	Henan-China	6.35948	6.33003	6.16169	4.7588	4.42477	4.29634	4.94214	4.73786	4.91137	5.21361
Zheng3093	Henan-China	6.63379	6.618	6.41083	5.10908	5.41283	4.77178	4.91854	4.70796	4.89411	5.49744
Sanyuehuang	Shaanxi-China	5.8974	5.69793	5.65874	4.15192	3.74848	3.97372	4.38291	4.59331	4.64906	4.75039
Wuhuatou	Henan-China	4.58577	4.35039	4.21979	4.59204	4.24636	4.29788	4.72121	4.29553	4.17212	4.38679
Tutoumai	Jiangsu-China	4.86709	5.00217	5.18399	4.21551	4.24286	4.59418	4.27442	4.06099	4.10508	4.50514
Baisuibai	Henan-China	4.66647	4.74656	4.78169	4.48057	4.39796	4.2726	4.02215	4.1015	4.2421	4.4124
Qumangmai	Henan-China	5.64222	5.88465	5.64143	4.8228	4.29074	4.47215	4.12165	4.34281	4.07571	4.81046
Zhengzhou6hao	Henan-China	4.5922	4.66694	4.88633	4.20706	4.31557	4.33635	4.03129	4.38805	4.33076	4.41717
Zhengyin1hao	Henan-China	5.4799	5.72411	5.84538	4.56909	4.97364	4.51839	4.84554	5.0213	5.13063	5.12311
Shengxuan7hao	Jiangsu-China	5.21022	5.19845	5.23258	5.12829	5.57624	5.13493	4.07938	4.36002	4.06178	4.88688
Shuangfengshou	Shaanxi-China	4.89813	5.37863	5.1716	5.01109	5.10271	5.00067	4.77499	5.01592	4.73151	5.00947
Zhengzhou7hao	Henan-China	5.72253	5.50937	5.31909	5.22284	5.03003	5.06786	4.18156	4.28584	4.07965	4.93542
Wanchangsui	Henan-China	4.86276	4.84671	4.98415	5.01477	5.2191	5.03936	4.32568	4.29493	4.14475	4.74802
Yuanzhu	Henan-China	5.99066	5.94312	6.19255	5.37453	5.33767	5.29282	4.6061	4.71583	4.56189	5.33502
Longfumai4hao	Heilongjiang-China	5.49188	5.74594	6.00739	5.31613	5.39511	5.35116	4.7308	4.58156	4.54159	5.24017
Yizheng8165	Jiangsu-China	5.5251	5.99406	5.51931	5.43489	4.95531	5.17024	4.59423	4.50976	4.55981	5.1403
Taizao2hao	Shandong-China	5.62871	5.28693	5.39721	4.96971	5.16495	5.08586	4.62845	4.21407	4.5332	4.9899
Yumai17	Henan-China	5.6496	6.2285	6.3069	5.45897	5.68242	5.33272	4.51909	4.60785	4.45798	5.36045
Chuanmai50	Sichuan-China	5.17706	5.23117	5.19711	4.57004	4.46187	4.21835	4.06008	4.5069	4.15136	4.61933
Chuanmai46	Sichuan-China	5.58813	5.99321	5.96798	4.4664	4.67226	4.4867	4.11553	4.07097	3.99419	4.81727
Chuanmai44	Sichuan-China	5.74282	5.4502	5.74742	4.96071	5.09191	5.04708	4.42536	4.20959	4.36201	5.00412
Chuanmai107	Sichuan-China	6.19759	6.07597	5.83192	5.14874	5.23903	5.21169	5.02903	4.48068	4.84864	5.34036
Mianyang35	Sichuan-China	5.48529	5.4955	5.83766	5.04769	5.13384	4.46341	4.42136	4.5023	4.23961	4.95852
Zhengmai101	Henan-China	5.68424	5.07725	5.64227	5.67025	5.87391	5.3658	4.41262	4.59986	4.62421	5.21671
Zhengmai518	Henan-China	6.56647	6.7906	6.33913	5.57168	5.58522	5.55505	4.74907	4.73169	4.46612	5.595
Aikang58	Henan-China	5.05688	5.3019	5.46522	5.39028	5.42413	5.43849	4.55293	4.0296	4.29183	4.99458
Shannong22	Shandong-China	5.35976	5.37863	5.1674	5.51945	5.75567	5.54679	4.55023	4.38383	4.2934	5.10613
Nongda211	Beijing-China	5.4253	5.52021	5.43518	5.36534	5.58935	5.58821	4.87449	4.30785	4.43458	5.17117
Shannong19	Shandong-China	4.51533	4.50149	4.92271	5.17663	5.36736	5.24284	4.17632	4.30003	4.26763	4.71893
Shannong06-278	Shandong-China	4.97896	5.09885	4.82283	5.76332	5.14162	5.00327	4.15666	4.17852	4.24873	4.82142
Yangmai18	Jiangsu-China	4.8106	5.08671	5.45502	5.20582	5.50321	5.25141	4.55717	4.69719	4.82974	5.0441
Ningmai17	Jiangsu-China	4.80474	4.96334	4.77989	4.97548	5.25931	5.17663	4.99413	4.68252	5.03816	4.9638
Ningmai13	Jiangsu-China	4.8898	5.22383	5.08605	5.16583	4.70851	4.69543	4.46619	4.432	4.65657	4.8138
Zhenmai168	Jiangsu-China	4.48231	5.01401	4.78095	5.0988	5.01515	4.93709	4.4875	4.36376	4.52412	4.74486
Yangmai12	Jiangsu-China	4.97747	5.02636	5.06	5.72502	5.87836	5.40916	4.77105	4.58897	4.65141	5.12087
Yangmai14	Jiangsu-China	4.8821	5.25887	4.64935	5.14171	4.74106	4.93482	4.43524	4.74855	4.63485	4.82517
Huamai5hao	Jiangsu-China	4.75504	4.59867	4.18504	4.98508	5.13766	5.40732	4.08094	4.45968	4.21224	4.64685
Yangmai20	Jiangsu-China	5.11694	5.21321	4.71753	5.15546	5.15798	4.93204	4.84772	4.70847	4.96879	4.97979
Yangmai21	Jiangsu-China	4.84402	5.14932	5.41409	5.09993	4.44871	4.90834	4.80748	4.74523	4.62648	4.89373
Zhengmai379	Henan-China	6.1894	6.50782	6.35464	5.46884	5.28432	5.24954	4.78036	4.89767	4.93395	5.5185
Zhengmai05706	Henan-China	5.5882	5.69993	5.8378	5.88806	5.22881	5.08397	4.28394	5.09661	4.6137	5.25789
Zhengmai113	Henan-China	5.575	5.8312	5.93648	4.60756	4.77929	4.4392	4.34694	4.22668	4.64043	4.93142
Zhengmai369	Henan-China	5.75586	5.41658	5.77395	5.43827	5.32081	5.39952	5.00202	4.91524	5.04174	5.34044
Zhengmai05871	Henan-China	5.3358	5.54011	5.62237	4.679	4.84297	4.79811	4.60362	4.61024	4.86413	4.98848
Xinmai19	Henan-China	5.43525	5.64725	5.66834	5.13675	5.76501	5.01109	4.60023	4.79145	4.81687	5.20803
Shannong26	Shandong-China	5.77374	6.15727	6.26364	6.23826	5.46301	5.69931	4.82543	4.5095	4.47948	5.48996
Shijiazhuang8hao	Hebei-China	5.74576	5.55017	6.50906	5.69932	5.20352	5.54138	5.53694	5.50197	5.51733	5.64505

## Sheet: Table S2 Phenotypic description
Table S2. Descriptive statistics of RS content under three locations in the association population
Locations	Mean±SD	Min	Max	CV%	Skewness	Kurtosis	Shapiro-Wilk test （P value）
Shangqiu	5.54±0.55	3.98	7.28	10	0.03	0.43	0.062
Kaifeng	4.95±0.46	3.81	6.57	9	0.38	0.59	0.017
Yuanyang	4.89±0.48	3.8	6.34	10	0.44	-0.16	0.004
mean	5.12±0.59	3.8	7.28	11	0.43	0.004	0.004

## Sheet: Table S3 ANOVA
Table S3. Analysis of variance (ANOVA) and broad-sense heritability for RS content based on three environments
Trait	ANOVA				Broad-sense heritability (H2)
RS content	Genotype	Environment	Genotype×Environment	Error	0.2
	0.85***	79.33***	0.68***	0.05
Source of variation	Sum of squares	df	P-value
Genotypes	175.071	206	3.8e-261
Environments	158.662	2	0
Genotypes×Environments	279.668	412	5e-292
Error	58.2902	1242

## Sheet: Table S4 Additive superior SNP
Table S4. Number of superior SNP and RS content of each accession in the association population
Accession	No. of superior SNPa	RS content (%)
Changwu135	15	5.20667
Shan229	17	5.55333
Xiaoyan6hao	14	5.08333
Lantian10hao	12	5.07333
Luohan3hao	17	5.36
Jing411	20	5.45667
Ningdong1hao	20	5.42667
Mianyang11	18	5.23
Taishan5hao	17	6.15333
Xinmai13hao	12	5.59667
Xinmai18hao	8	5.31
Zhoumai16hao	15	4.82333
Yuanfeng139	8	4.99333
Fengchan3hao	10	5.15667
Zhongyu8hao	16	4.9
Bainong160	14	5.19
Luomai21hao	12	5
YanZhan4110	19	5.41
Han6172	19	5.36333
Huaimai21	20	5.79333
Mianyang26	8	5.08667
Lunxuan715	17	5.36667
Youpi1hao	20	5.71
Xifeng9hao	18	5.25333
Nongda198	19	5.08
Kedong81	17	5.23333
Linfen10hao	11	4.73
Fengkang5hao	18	5.40667
Changfeng1hao	13	5.00333
Jingdong1hao	15	5.35
Jinmai21	13	5.05333
Jimai23	21	4.97333
Hanxuan10hao	18	5.5
Xianshixinmai	14	4.77
Chixiaomai	11	5.15
Bima1hao	17	5.05333
Aimengniu	11	5.08333
Wenmai6hao	13	5.15667
MazhaMai	18	5.10667
Dayuhua	6	4.71667
Chushanbao	14	4.98333
Dalibanmang	14	4.82333
Baimazha	16	5.12667
Ganmai8hao	17	5.41333
Yunmai34hao	10	5.03
Wuyimai	15	5.49
Nanda2419	14	5.13
Nonglin10hao	13	4.88333
Hanyangmai	18	5.81
Luofulin10hao	13	5.05667
Aifeng3hao	10	4.76
Yunhan618	20	4.99667
Yannong21	20	4.92333
Jinmai47	17	5.18667
Changwu58	17	5.05667
Zhenghan1hao	20	5.07667
Chang6878	11	5.14667
Luohan1hao	13	5.01667
Luohan6hao	20	5.12
Luohan11hao	15	5.09333
PuXing5hao	17	5.35
Ruiquanmai24	15	5.11667
Dehongfu2hao	20	5.00333
Zhongmai895	16	4.87667
Huaimai35	21	5.18333
Longpingmai518	21	5.58667
Huaimai30	14	4.91333
Zhongyuan6hao	20	5.85
Pingan8hao	18	5.61667
Bainong207	16	5.08333
Cun1hao	16	5.14667
Zhoumai26	15	5.42
LuoMai18	18	5.01333
Baofeng10-82	17	5.25333
Su553	12	4.54333
09N37	13	5.28
Guinong17	17	5.03667
Hengguan35	12	4.95
Yumai18	11	4.76333
Yumai13	16	5.4
Yumai47	16	5.11667
Zhengmai004	10	4.85667
Yumai50	19	5.57667
Taikong6hao	13	5.01667
Huapei5hao	18	5.19
Hua9987	17	5.29333
Yujiao5hao	15	5.63
Yunong416	21	5.38333
Bainong64	16	4.82333
Zhoumai9hao	14	5.15667
Zhoumai13	18	5.18
Zhoumai8425B	12	4.80333
Kaimai21	14	5.16
LuoZhen1hao	13	4.76333
Neixiang188	14	5.52333
Aiyou26-2	15	5.13333
Changgeheili	13	4.9
Lvmai1hao	14	5.52333
Subeimai1hao	16	5.43
Jinan17	16	5.16667
Jimai20	14	4.99667
Shan225	12	5.40667
Xinong979	22	5.64
Aobaxter	13	5.25
Aocd87	11	5.44333
Aokukri	14	5.02667
Faguomai	13	5.42333
Belero	17	5.61667
Fundulea900	12	5.44333
Tincurrin	13	5.29667
H149	19	5.49333
Fab08	12	4.74667
Fab20	14	4.95333
Bainong416	16	5.26667
Luo31	11	5.34333
Taihemai1hao	15	5.41
Junmai35	15	5.17333
Luomai23	20	5.43667
Jiaomai266	13	4.48333
WenNong14hao	14	5.38333
Jimai22	15	5.36333
Ningmai9hao	12	4.84
10Ew28	18	5.53333
10Ew137	11	4.94
Zhou18	12	4.73333
04Zhong38	16	5.05667
Yumai34-9901	9	4.79333
Zheng9023-8	19	5.33333
Zheng103	19	4.87
Aocalingiri	11	4.68667
Zhengmai366	8	4.39
Zhengmai7698	18	5.13667
Zhoumai22	13	5.45
Zhoumai27	14	5.09667
Zhoumai30	15	5.25333
Zhoumai32	14	4.98
Liangxing66	16	4.99
Dongmai25	11	5.12667
Ningchun5hao	20	5.27
Shannong33	12	4.71
Zhongmai175	20	5.41
GaoCheng8901	13	4.76667
Shannongtedali1hao	19	4.78333
Changmai9hao	14	5.04
Yangfumai2hao	9	4.92333
Wanmai53	7	4.99
Fanmai8hao	10	4.58333
Yunmai51	15	5.59333
Yunmai53	13	4.87
Yunmai47	15	5.12
Xinong928	17	5.42
Xinmai26	15	5.52667
Wanmai47	15	5.22333
Yangmai13	7	5.35667
GaoYou2018	12	5.16
GaoYou9415	5	4.59667
Shiluan02-1	14	5.79667
Zheng1005	21	5.43
Zheng1105	10	4.95333
Zheng1118	10	4.51
Zheng1289	17	5.21
Zheng3093	20	5.49667
Sanyuehuang	11	4.75
Wuhuatou	9	4.39
Tutoumai	12	4.50667
Baisuibai	6	4.41
Qumangmai	12	4.81
Zhengzhou6hao	9	4.42
Zhengyin1hao	17	5.12333
Shengxuan7hao	17	4.88667
Shuangfengshou	14	5.01
Zhengzhou7hao	13	4.93667
Wanchangsui	8	4.75
Yuanzhu	11	5.33667
Longfumai4hao	12	5.24
Yizheng8165	12	5.14
Taizao2hao	15	4.99
Yumai17	12	5.36
Chuanmai50	13	4.62
Chuanmai46	11	4.81667
Chuanmai44	13	5.00333
Chuanmai107	12	5.34333
Mianyang35	14	4.96
Zhengmai101	20	5.22
Zhengmai518	14	5.59667
Aikang58	16	4.99333
Shannong22	19	5.10667
Nongda211	19	5.17
Shannong19	13	4.72
Shannong06-278	13	4.82
Yangmai18	6	5.04333
Ningmai17	5	4.96333
Ningmai13	9	4.81667
Zhenmai168	9	4.74667
Yangmai12	7	5.12
Yangmai14	9	4.82667
Huamai5hao	4	4.64667
Yangmai20	14	4.98
Yangmai21	6	4.89667
Zhengmai379	18	5.51667
Zhengmai05706	17	5.25667
Zhengmai113	14	4.93
Zhengmai369	13	5.34333
Zhengmai05871	13	4.98667
Xinmai19	10	5.20667
Shannong26	15	5.48667
Shijiazhuang8hao	18	5.64333
a For each SNP, the varieties with the homozygous of superior alleles were defined the number of 2, counterpartly the varieties genotyped of homologous were assigned the number of 0.Similarly, the heterozygous containing varieties were scored as 1.

## Sheet: Table S5 Candidate genes
Table S5 Differentially expressed genes annotation in all the integrated QTL
Peak SNP	Annotated genes	Expression leve in tissues (FPKM)					Function description
		Grain	Leaf	Roots	Spike	Stem
AX_94546744	TraesCS4D03G0004500	0.881341	0.856659	2.13962	2.19205	1.96839	RING/U-box superfamily protein
	TraesCS4D03G0000900	1.48818	0.309229	1.8803	1.64172	1.10618	2-phosphoglycerate kinase
	TraesCS4D03G0002900	2.77048	2.39003	2.82794	2.59448	2.77351	Mesoderm induction early response protein 1, putative isoform 1
	TraesCS4D03G0000200	2.68465	2.9938	2.91822	3.08724	3.0007	SPFH domain/band 7 family protein
	TraesCS4D03G0010800	2.33041	2.26105	2.12656	2.80403	2.51334	Beta-amylase
	TraesCS4D03G0020900	2.18149	3.33743	2.86526	3.15386	2.89748	Chaperone protein DnaJ
	TraesCS4D03G0020600	4.61552	5.03402	6.57346	6.63598	8.24737	5-methyltetrahydropteroyltriglutamate--homocysteine methyltransferase
	TraesCS4D03G0003800	1.43938	0.753673	1.21376	1.86831	1.0651	ACT domain-containing protein
	TraesCS4D03G0011700	6.43166	5.80965	6.39223	6.44217	6.09567	F1F0-ATPase inhibitor protein
	TraesCS4D03G0019600	0.967139	3.43063	0	2.00112	2.72737	Short-chain dehydrogenase/reductase family protein
AX_108969238	TraesCS5A03G0943300	3.52895	1.65373	0	5.20833	1.78904	Alpha-1,4 glucan phosphorylase
	TraesCS5A03G0943900	3.34208	2.42519	3.4025	3.51418	3.13176	Ankyrin repeat family protein
	TraesCS5A03G0944000	1.66482	2.11764	3.30153	3.94434	3.788	Blue copper protein
	TraesCS5A03G0944100	1.32594	1.24133	2.55993	2.64095	2.41705	Serine/threonine phosphatase-like protein
	TraesCS5A03G0945600	0.626699	1.01243	2.22653	2.97069	2.43037	T-box transcription factor, putative (DUF863)
	TraesCS5A03G0948900	2.75979	2.35064	3.14067	3.55919	3.34648	TIP41-like family protein
	TraesCS5A03G0949900	2.48305	0	0	0	0	Gibberellin-regulated protein 1
	TraesCS5A03G0950100	2.8983	3.923	2.87862	4.28827	3.43496	Upstream activation factor subunit spp27
	TraesCS5A03G0952000	4.56987	5.28889	4.99672	4.20761	4.07382	Phosphatase 2C family protein
	TraesCS5A03G0952600	3.55448	4.38071	5.10633	4.45851	4.88614	Protein kinase
	TraesCS5A03G0953300	2.52779	1.53414	3.01005	3.52775	2.89784	Peroxidase
	TraesCS5A03G0955600	3.48644	3.2749	3.45152	4.06217	3.68457	Upstream activation factor subunit spp27
	TraesCS5A03G0956400	1.71771	2.54192	2.57212	2.7282	2.98532	Tunicamycin induced 1
	TraesCS5A03G0956900	4.27396	4.0743	3.22792	3.28024	4.25705	Maternal effect embryo arrest 14-1
	TraesCS5A03G0957400	3.84386	3.65245	4.7396	4.77027	4.52703	Transmembrane protein 147
	TraesCS5A03G0958000	3.52583	2.62062	5.02547	4.126	4.9282	Cytochrome P450 allene oxide synthase
	TraesCS5A03G0958500	0.163622	0.369504	1.46752	1.34453	1.49045	BTB/POZ domain-containing protein
	TraesCS5A03G0958900	3.13796	4.83334	4.18542	4.12232	4.43889	Cold acclimation protein
	TraesCS5A03G0959100	1.42595	1.68766	2.63831	2.25086	2.31842	HTH-type transcriptional regulator
	TraesCS5A03G0960300	1.45882	1.35727	1.39264	2.27659	1.88851	transmembrane protein (DUF616)
	TraesCS5A03G0960400	3.19732	6.65528	0	3.57916	4.86838	30S ribosomal protein S9
	TraesCS5A03G0963000	1.55276	1.16267	1.826	2.50538	1.28125	Eukaryotic translation initiation factor 3 subunit C
	TraesCS5A03G0963300	0.659196	2.15306	0.790846	0	1.11108	Lectin receptor kinase
	TraesCS5A03G0965300	6.80435	6.70502	7.76458	7.65137	7.33432	30S ribosomal protein S14 type Z
	TraesCS5A03G0967400	5.02756	5.56361	6.14427	6.10129	6.04068	NADH-quinone oxidoreductase subunit I
	TraesCS5A03G0967900	1.79174	3.99606	2.75922	3.60432	3.03651	Cytosolic purine 5-nucleotidase
	TraesCS5A03G0969000	0.164868	0	1.60565	1.56134	2.76571	Auxin-responsive protein
	TraesCS5A03G0969000	0.164868	0	1.60565	1.56134	2.76571	Auxin-responsive protein
	TraesCS5A03G0971200	3.37058	0.128076	0	3.4947	0.975256	Myb/SANT-like DNA-binding domain protein
	TraesCS5A03G0975200	0.0959835	0	0.18853	1.12664	0.536914	N-acetylglucosaminyl-phosphatidylinositol biosynthetic protein gpi1
AX_109448373	TraesCS5A03G0031900	2.95417	1.86238	3.23165	1.3688	2.41501	Receptor protein kinase, putative
	TraesCS5A03G0016200	0.242826	0	0	0	0	DNA-directed RNA polymerase subunit beta, putative (DUF630 and DUF632)
	TraesCS5A03G0018600	0.751221	0	0	1.29965	0	Serine protease HtrA-like
	TraesCS5A03G0019300	2.64214	0.422336	0	4.08606	2.09276	Serine protease HtrA-like
	TraesCS5A03G0020900	0.467441	2.85195	0	0	4.14732	Cytochrome P450
	TraesCS5A03G0021600	0.776374	0.621023	0	1.96716	1.70599	Elongation factor Ts
	TraesCS5A03G0022300	2.03485	1.88594	0	4.05431	2.87027	Ankyrin repeat protein-like
	TraesCS5A03G0022400	1.19404	1.61599	0	4.11457	2.70181	Ankyrin repeat protein-like
	TraesCS5A03G0023200	1.00355	0	0.640239	0.345512	0	rRNA adenine N(6)-methyltransferase
	TraesCS5A03G0023300	2.46922	1.82092	2.69252	3.41199	2.85717	SacI-like domain protein/WW domain protein
	TraesCS5A03G0023900	1.06729	0	0.249842	2.033	0.543995	Elongation of fatty acids protein 3-like
	TraesCS5A03G0025300	2.823	2.84148	4.142	3.04757	3.32375	WD repeat-containing protein 43
	TraesCS5A03G0030600	1.76989	0.960857	1.63619	3.49171	2.41958	Hydroxyproline-rich glycoprotein-like
	TraesCS5A03G0032300	0.889083	0	0	0	0	F-box family protein
	TraesCS5A03G0032700	0.733497	1.12187	2.20311	1.12679	1.67425	Neutral ceramidase
	TraesCS5A03G0035400	1.89937	1.61824	2.47936	2.90164	2.55578	ADP-ribosylation factor
	TraesCS5A03G0035600	2.09886	1.36679	2.81035	3.72567	3.06708	Pyridine nucleotide-disulfide oxidoreductase domain-containing protein 2
AX_110371230	TraesCS2A03G1236800	0.439109	0	2.74494	1.39277	1.79274	Pre-mRNA-splicing factor SYF2
	TraesCS2A03G1246800	0.650124	0	0	0	0	Gibberellin 3-beta-hydroxylase 2
	TraesCS2A03G1251900	1.18715	1.40198	1.97431	3.1185	1.73143	Acyl-protein thioesterase 1
	TraesCS2A03G1253700	1.92287	0	0	2.94058	0.701633	PP2A regulatory subunit TAP46
	TraesCS2A03G1253800	3.26682	4.42201	5.62449	4.28729	4.52263	Methylthioribose kinase
	TraesCS2A03G1259700	2.01028	0	0	0	0	Cytochrome P450 family protein, expressed
	TraesCS2A03G1263100	1.79216	0	0	0	0	Cytochrome P450, putative
	TraesCS2A03G1263400	2.00569	1.67434	2.4393	2.86487	2.29298	Zinc finger CCCH domain-containing protein 32
	TraesCS2A03G1263500	5.03898	4.18751	4.16189	3.63033	3.90118	Phosphoribosylformylglycinamidine synthase subunit PurQ
	TraesCS2A03G1264000	2.03038	3.4111	3.86462	3.77793	3.33469	Amine oxidase family protein
	TraesCS2A03G1264100	4.17228	3.79166	2.83835	4.17088	4.315	Amine oxidase family protein
	TraesCS2A03G1264200	1.11507	1.56417	1.94282	2.36188	2.21518	Adenylate kinase
	TraesCS2A03G1266300	2.91889	2.71618	3.89339	4.14342	3.61228	UBX domain-containing protein
	TraesCS2A03G1271900	3.526	2.56028	2.85559	3.63866	3.26679	Peroxisome biogenesis protein 22
	TraesCS2A03G1274800	2.83723	1.3034	1.67148	2.48258	2.12599	Ubiquinone biosynthesis protein COQ4 homolog, mitochondrial
	TraesCS2A03G1274900	1.89699	2.01444	2.68	3.15078	2.7863	Vacuolar protein sorting-associated protein 41-like protein
	TraesCS2A03G1275200	1.49908	1.58042	1.64944	1.69452	1.87912	Pentatricopeptide repeat-containing protein
	TraesCS2A03G1278800	5.29408	4.18819	4.65328	4.89994	4.40376	Anamorsin homolog
	TraesCS2A03G1280900	2.15612	1.63388	2.22189	0.951581	1.59302	Acetyl-coenzyme A synthetase
AX_111564575	TraesCS2A03G1353600	1.97622	2.25544	3.39907	2.29347	2.37144	E3 ubiquitin-protein ligase	PF02225: PA domain; PF13639: Ring finger domain
	TraesCS2A03G1350700	0.87006	1.41614	2.23372	1.74996	2.84536	Protein NRT1/ PTR FAMILY 5.5	PF00854: POT family
	TraesCS2A03G1348500	3.22633	1.39289	1.854	2.75063	2.01611	DDB1-and CUL4-associated factor-like protein 1	null
	TraesCS2A03G1345300	2.28578	1.9173	2.51295	3.38566	2.78471	Nodulin homeobox	null
	TraesCS2A03G1344900	0.375188	0.145667	0.548678	1.3452	0.673642	cDNA clone:J033115O13, full insert sequence	null
	TraesCS2A03G1338300	4.09645	4.19137	6.19143	4.90833	4.92418	ATP synthase subunit alpha, chloroplastic	null
	TraesCS2A03G1337300	3.17627	2.22741	6.9852	1.54074	4.07468	Peroxidase	PF00141: Peroxidase
	TraesCS2A03G1335500	0.47333	0	2.93953	0	1.50931	Peroxidase	PF00141: Peroxidase
	TraesCS2A03G1330600	0.191852	0	0.340047	1.34751	0.660936	F-box family protein	PF00646: F-box domain
	TraesCS2A03G1330500	2.73694	2.99639	3.82449	3.75501	3.64363	30S ribosomal protein S11	PF00411: Ribosomal protein S11
	TraesCS2A03G1330000	0.829621	0	0	0.693866	0	WAT1-related protein	PF00892: EamA-like transporter family
	TraesCS2A03G1328200	5.04073	3.32811	4.64002	4.53175	4.11665	Inorganic pyrophosphatase	PF00719: Inorganic pyrophosphatase
	TraesCS2A03G1324400	3.74223	4.8637	4.39982	4.58639	4.74972	3-isopropylmalate dehydrogenase	PF00180: Isocitrate/isopropylmalate dehydrogenase
	TraesCS2A03G1324300	1.29087	0.943588	1.24929	1.95883	1.72635	UPF0235 protein	PF02594: Uncharacterised ACR, YggU family COG1872
	TraesCS2A03G1320000	1.32226	3.66002	2.31547	2.79593	2.68279	Glutathione-regulated potassium-efflux system protein	PF00999: Sodium/hydrogen exchanger family; PF02254: TrkA-N domain
AX_94833369	TraesCS4A03G0764800	1.78058	0.989238	1.73392	2.4967	1.7524	Protein HIRA	PF00400: WD domain, G-beta repeat; PF07569: TUP1-like enhancer of split
	TraesCS4A03G0780600	2.00801	0.658433	1.33521	1.6682	2.13605	mesoderm induction early response protein	null
	TraesCS4A03G0788500	2.24408	1.13365	2.08558	0.965178	0.439133	OTU domain-containing protein	PF02338: OTU-like cysteine protease
AX_94853365	TraesCS3A03G1213000	1.21063	0	0	1.20175	0	FBD-associated F-box protein	PF00646: F-box domain
	TraesCS3A03G1223400	0.860629	0.62284	1.4144	2.32379	1.4884	F-box domain containing protein-like	null
	TraesCS3A03G1214700	0.426368	0	0	0	0	FBD-associated F-box protein	PF00646: F-box domain
AX_95258478	TraesCS2B03G0276500	1.41295	0	0	0.756413	0	RINT1-like protein	PF04437: RINT-1 / TIP-1 family
	TraesCS2B03G0276600	1.60386	3.71832	3.6798	0	1.39724	Protein kinase	PF07714: Protein tyrosine kinase
	TraesCS2B03G0271500	0.861328	1.20182	0.361243	1.95961	1.62294	Chaperone protein ClpB	null
	TraesCS2B03G0276000	2.88319	2.66669	2.43459	4.4049	3.74354	2-dehydro-3-deoxyphosphooctonate aldolase	PF00793: DAHP synthetase I family
	TraesCS2B03G0273100	6.70365	7.58479	8.39378	8.31904	7.87873	Calmodulin	PF13202: EF hand; PF13833: EF-hand domain pair; PF13499: EF-hand domain pair
	TraesCS2B03G0284600	2.44349	2.71749	3.6052	3.15118	3.55875	Thioredoxin, putative	PF00085: Thioredoxin
AX_110545722	TraesCS5B03G0973000	3.10071	2.86636	3.72795	3.98052	3.62166	Kinase-like protein	PF07714: Protein tyrosine kinase
	TraesCS5B03G0973900	1.95585	2.19782	2.98952	3.26762	3.04338	tRNA (guanine-N(7)-)-methyltransferase non-catalytic subunit	PF00400: WD domain, G-beta repeat
	TraesCS5B03G0974900	0.267496	0	1.32333	1.76521	0.948811	Sigma non-opioid intracellular receptor 1	null
	TraesCS5B03G0977000	3.0089	3.03344	3.53433	3.48855	3.95757	PHD finger protein ING	PF12998: Inhibitor of growth proteins N-terminal histone-binding; PF00628: PHD-finger
	TraesCS5B03G0978400	2.37413	2.08041	2.67882	3.30465	2.78503	Protein kinase family protein, putative, expressed	PF00069: Protein kinase domain
	TraesCS5B03G0978600	1.30609	0.311282	2.66343	0.645895	1.09861	Maltase-glucoamylase, intestinal	null
	TraesCS5B03G0979500	2.45891	3.56124	3.58576	4.38282	3.71728	RNA binding family protein isoform 1	PF00076: RNA recognition motif. (a.k.a. RRM, RBD, or RNP domain)
	TraesCS5B03G0981700	0.702419	4.60656	5.82624	0	4.4734	Beta-glucosidase	PF00933: Glycosyl hydrolase family 3 N terminal domain; PF01915: Glycosyl hydrolase family 3 C-terminal domain
	TraesCS5B03G0981900	2.59065	1.37323	2.56351	3.38596	2.84891	Protein kinase	PF00069: Protein kinase domain
	TraesCS5B03G0982000	0.440816	0.767831	1.6557	1.1877	1.34026	Protein-lysine N-methyltransferase	PF10237: Probable N6-adenine methyltransferase
	TraesCS5B03G0982100	4.18793	0	0	0	0	Universal stress protein family protein	PF00582: Universal stress protein family
	TraesCS5B03G0983100	2.98277	3.44066	2.19345	3.73202	2.7509	Strictosidine synthase	PF03088: Strictosidine synthase
	TraesCS5B03G0983300	3.3303	2.67726	3.22966	4.2004	3.2864	Transcriptional adapter ADA2	PF00249: Myb-like DNA-binding domain
	TraesCS5B03G0983500	4.00859	3.49418	4.88009	5.5064	4.36533	HMG-Y-related protein A	PF00538: linker histone H1 and H5 family
	TraesCS5B03G0984200	0.973445	2.81104	4.86536	2.76795	2.68445	oligopeptide transporter	PF03169: OPT oligopeptide transporter protein
	TraesCS5B03G0989800	0.600993	0	0	1.48283	0	UDP-glycosyltransferase	PF00201: UDP-glucoronosyl and UDP-glucosyl transferase
	TraesCS5B03G0990600	0.955385	0	1.28077	0	0	UDP-glycosyltransferase	PF00201: UDP-glucoronosyl and UDP-glucosyl transferase
AX_110911991	TraesCS2A03G1018400	1.04763	1.08613	1.74957	2.50007	1.58222	Potassium transporter
	TraesCS2A03G1019500	1.05318	0.134343	0.701826	1.78689	1.12413	Protein strawberry notch-like protein 1
	TraesCS2A03G1025100	4.72277	4.3758	5.56106	5.65553	5.23542	26S proteasome non-ATPase regulatory subunit 1
	TraesCS2A03G1030400	7.01668	6.68967	7.22897	7.14439	6.96955	60S ribosomal protein L7
	TraesCS2A03G1034500	2.44489	2.42847	0.920379	3.48884	2.90202	Calcium-binding EF hand protein
AX_111079685	TraesCS6A03G1023600	0.68806	0.843071	0.696305	1.70765	1.03886	ATP-dependent RNA helicase	PF00270: DEAD/DEAH box helicase; PF00271: Helicase conserved C-terminal domain
	TraesCS6A03G1023700	0.658986	0.944828	2.54432	2.49493	2.63096	ADP-L-glycero-D-manno-heptose-6-epimerase	PF04321: RmlD substrate binding domain
	TraesCS6A03G1025300	2.88708	2.13329	3.47468	4.0575	3.99867	Leucine-rich repeat receptor-like protein kinase family protein, putative	PF13855: Leucine rich repeat
	TraesCS6A03G1026400	2.22048	1.83867	3.14406	2.95611	3.14788	Sucrose transporter	PF13347: MFS/sugar transport protein
	TraesCS6A03G1026800	4.30988	4.10883	4.61192	4.89685	4.63645	Splicing factor 3B subunit 2	PF04037: Domain of unknown function (DUF382); PF04046: PSP
	TraesCS6A03G1027000	2.49843	2.45348	2.92922	3.61547	3.20135	Prefoldin chaperone subunit family protein	PF01920: Prefoldin subunit
	TraesCS6A03G1033200	0.649193	0.200083	0	2.3369	0.678999	Disease resistance protein (NBS-LRR class) family	PF00931: NB-ARC domain
	TraesCS6A03G1040500	4.06259	5.17955	4.60709	4.92845	5.04283	Mitochondrial intermediate peptidase	PF01432: Peptidase family M3
	TraesCS6A03G1041200	4.36426	4.43325	5.25392	5.38816	5.26062	ATP-dependent RNA helicase	PF00270: DEAD/DEAH box helicase; PF00271: Helicase conserved C-terminal domain
	TraesCS6A03G1042700	2.02004	0.711811	1.45479	2.81495	1.90809	F-box protein	null
	TraesCS6A03G1042900	2.59918	1.18164	1.71425	2.44945	2.01964	Protein furry homolog-like protein	PF14222: Cell morphogenesis N-terminal; PF14228: Cell morphogenesis central region; PF14225: Cell morphogenesis C-terminal
	TraesCS6A03G1043100	2.59359	3.08983	3.47875	3.50812	3.17514	Zinc finger CCCH domain-containing protein 19	PF15663: Zinc-finger containing family
	TraesCS6A03G1043300	1.57357	2.18019	2.7937	2.89385	2.72091	Regulator of chromosome condensation (RCC1) family protein	null
	TraesCS6A03G1045100	1.62267	3.22571	0	3.18749	2.10726	low-temperature-induced protein	null
	TraesCS6A03G1045900	1.83202	2.23235	3.82469	2.3245	2.86715	Homoserine kinase	PF00288: GHMP kinases N terminal domain; PF08544: GHMP kinases C terminal
	TraesCS6A03G1046500	1.85064	0	0	0	0	Protein SAWADEE HOMEODOMAIN-like protein 2	PF16719: SAWADEE domain
	TraesCS6A03G1046800	2.1336	0	0	0	0	Protein SAWADEE HOMEODOMAIN-like protein 2	PF16719: SAWADEE domain
	TraesCS6A03G1048100	2.63217	1.95238	2.63724	4.07248	3.60302	Callose synthase	PF04652: Vta1 like; PF14288: 1,3-beta-glucan synthase subunit FKS1, domain-1; PF02364: 1,3-beta-glucan synthase component
	TraesCS6A03G1048200	2.89895	3.47396	2.76536	3.47147	3.24718	Outer envelope pore protein	null
	TraesCS6A03G1049000	1.59961	1.37142	1.71708	2.90416	1.92477	PRLI-interacting factor	null
	TraesCS6A03G1050000	2.64524	2.62356	3.66493	3.96295	3.47522	Alpha-1,3-mannosyl-glycoprotein 2-beta-N-acetylglucosaminyltransferase	PF03071: GNT-I family
	TraesCS6A03G1050800	1.3621	2.91762	0.370646	1.79663	2.06237	Protein DETOXIFICATION	PF01554: MatE
	TraesCS6A03G1051300	2.59985	4.92435	2.576	3.42209	3.91258	TSA: Wollemia nobilis Ref_Wollemi_Transcript_29242_1275 transcribed RNA sequence	PF05542: Protein of unknown function (DUF760)
	TraesCS6A03G1051600	1.14916	5.41955	0	2.31204	3.90715	Epimerase family protein	PF01370: NAD dependent epimerase/dehydratase family; PF08338: Domain of unknown function (DUF1731)
AX_111140336	TraesCS7B03G0148800	2.67718	0	0	0	0	Alpha subunit of RNA polymerase	null
	TraesCS7B03G0149600	2.05153	0.370692	3.71806	2.3746	2.90133	Thiosulfate sulfurtransferase GlpE	PF00581: Rhodanese-like domain
	TraesCS7B03G0149800	3.43376	3.60175	4.63648	3.5256	3.99459	ATP-dependent DNA helicase	null
	TraesCS7B03G0151400	2.97877	0	0	0	0	NAC domain protein	PF02365: No apical meristem (NAM) protein
	TraesCS7B03G0152000	3.96547	2.85405	3.07095	4.39031	3.36609	Arginine/serine-rich splicing factor, putative	PF00076: RNA recognition motif. (a.k.a. RRM, RBD, or RNP domain); PF00098: Zinc knuckle
	TraesCS7B03G0152500	0.683469	1.73423	1.73301	1.72473	1.61142	Cyclic nucleotide-gated channel	PF00520: Ion transport protein
	TraesCS7B03G0162000	0.734375	0.800874	1.25639	1.81939	1.49784	ATP-dependent RNA helicase, putative	PF00271: Helicase conserved C-terminal domain; PF04408: Helicase associated domain (HA2); PF07717: Oligonucleotide/oligosaccharide-binding (OB)-fold
	TraesCS7B03G0162100	3.71472	2.88727	4.03749	4.32506	3.86341	26S protease regulatory subunit	PF00004: ATPase family associated with various cellular activities (AAA)
	TraesCS7B03G0166400	4.92777	3.88968	4.36659	5.81014	6.0769	Ethylene-responsive transcription factor	PF00847: AP2 domain
AX_111141477	TraesCS2D03G0964200	4.71366	4.40458	5.50289	5.62689	5.21137	26S proteasome non-ATPase regulatory subunit 1	PF01851: Proteasome/cyclosome repeat; PF13646: HEAT repeats
	TraesCS2D03G0974300	1.54247	1.63226	1.51178	2.82851	1.97354	Villin	PF00626: Gelsolin repeat; PF02209: Villin headpiece domain
	TraesCS2D03G0975000	0.321073	1.00157	1.07774	1.36203	1.55973	Protein-S-isoprenylcysteine O-methyltransferase	PF04140: Isoprenylcysteine carboxyl methyltransferase (ICMT) family
	TraesCS2D03G0978300	3.77073	3.62987	3.6075	4.08059	4.47226	Calcium-binding EF hand protein	PF00036: EF hand
	TraesCS2D03G0983000	1.32787	1.00109	2.14739	1.89197	2.05743	histone-lysine N-methyltransferase	null
	TraesCS2D03G0984000	2.10855	0.856907	2.04262	3.02934	1.94774	WD-repeat cell cycle regulatory protein	PF12894: Anaphase-promoting complex subunit 4 WD40 domain; PF00400: WD domain, G-beta repeat
AX_111838051	TraesCS2D03G0927900	0.301313	1.58397	0	2.10224	1.51108	Acyl-CoA thioesterase, putative	PF13279: Thioesterase-like superfamily
	TraesCS2D03G0929100	0.52161	0	0	0.623865	0	Zinc finger protein	null
	TraesCS2D03G0929800	2.13311	1.78554	1.87588	1.81884	2.13466	Cyclin family protein	PF08613: Cyclin
	TraesCS2D03G0935800	4.75426	4.95105	6.49816	6.63376	5.93245	Histone H4	PF15511: Centromere kinetochore component CENP-T histone fold
	TraesCS2D03G0940500	1.28814	0.905405	2.31484	2.04165	1.8339	RNA polymerase II, Rpb4, core protein	PF03874: RNA polymerase Rpb4
	TraesCS2D03G0941800	1.83503	2.89989	2.37979	3.63644	4.50409	Elongation factor G	null
	TraesCS2D03G0944200	3.25437	4.55474	4.43448	4.13982	3.98091	Dehydrogenase	PF13561: Enoyl-(Acyl carrier protein) reductase

## Sheet: Table S6 Primer info
Table S6 Primers designed based on KASP marker AX-94546744
Primer	Sequence (5' to 3')
F1	GAAGGTGACCAAGTTCATGCTACATTTACCATTGAACCTCGCGCT
F2	GAAGGTCGGAGTCAACGGATTACATTTACCATTGAACCTCGCGCC
R2	GGTGTTTGAGGCATTGCGCTGATT

## Sheet: Table S7 KASP and RS
Table S7 RS content and genotype detected by KASP marker developed from peak SNP AX-94546744
Accession	SNP	RS content (%)
SH240	T	5.20667
SH241	T	5.55333
SH242	T	5.08333
SH243	C	5.07333
SH244	T	5.36
SH245	T	5.45667
SH246	T	5.42667
SH247	T	5.23
SH248	T	6.15333
SH249	T	5.59667
SH250	T	5.31
SH251	T	4.82333
SH252	C	4.99333
SH253	T	5.15667
SH254	T	4.9
SH255	T	5.19
SH256	T	5
SH257	T	5.41
SH258	C	5.36333
SH259	T	5.79333
SH260	T	5.08667
SH261	T	5.36667
SH262	T	5.71
SH263	T	5.25333
SH264	T	5.08
SH265	T	5.23333
SH266	C	4.73
SH267	T	5.40667
SH268	T	5.00333
SH269	T	5.35
SH270	T	5.05333
SH271	T	4.97333
SH272	T	5.5
SH273	T	4.77
SH274	C	5.15
SH275	T	5.05333
SH276	C	5.08333
SH277	T	5.15667
SH278	T	5.10667
SH279	C	4.71667
SH280	T	4.98333
SH281	T	4.82333
SH282	T	5.12667
SH283	T	5.41333
SH284	T	5.03
SH285	T	5.49
SH286	T	5.13
SH287	T	4.88333
SH288	T	5.81
SH289	T	5.05667
SH291	T	4.76
SH292	T	4.99667
SH293	T	4.92333
SH294	T	5.18667
SH295	T	5.05667
SH296	C	5.07667
SH298	T	5.14667
SH299	T	5.01667
SH300	T	5.12
SH301	T	5.09333
SH302	T	5.35
SH303	C	5.11667
SH304	T	5.00333
SH306	C	4.87667
SH307	T	5.18333
SH308	T	5.58667
SH309	T	4.91333
SH310	T	5.85
SH311	T	5.61667
SH312	T	5.08333
SH313	C	5.14667
SH314	T	5.42
SH315	T	5.01333
SH316	T	5.25333
SH317	C	4.54333
SH319	T	5.28
SH320	T	5.03667
SH321	C	4.95
SH322	T	4.76333
SH323	T	5.4
SH324	T	5.11667
SH325	T	4.85667
SH326	T	5.57667
SH327	T	5.01667
SH328	T	5.19
SH329	T	5.29333
SH330	T	5.63
SH331	T	5.38333
SH332	T	4.82333
SH333	T	5.15667
SH334	T	5.18
SH335	T	4.80333
SH336	T	5.16
SH338	T	4.76333
SH339	T	5.52333
SH340	T	5.13333
SH341	T	4.9
SH342	T	5.52333
SH343	T	5.43
SH344	T	5.16667
SH345	T	4.99667
SH346	T	5.40667
SH347	T	5.64
SH348	T	5.25
SH349	T	5.44333
SH350	T	5.02667
SH351	T	5.42333
SH352	T	5.61667
SH353	T	5.44333
SH354	T	5.29667
SH355	T	5.49333
SH356	T	4.74667
SH357	T	4.95333
SH358	T	5.26667
SH359	T	5.34333
SH360	T	5.41
SH361	T	5.17333
SH362	T	5.43667
SH363	T	4.48333
SH364	T	5.38333
SH365	T	5.36333
SH366	C	4.84
SH367	T	5.53333
SH368	T	4.94
SH369	T	4.73333
SH370	C	5.05667
SH371	T	4.79333
SH372	T	5.33333
SH373	T	4.87
SH374	T	4.68667
SH375	T	4.39
SH376	T	5.13667
SH377	T	5.45
SH378	T	5.09667
SH379	T	5.25333
SH380	T	4.98
SH381	T	4.99
SH382	T	5.12667
SH383	T	5.27
SH384	T	4.71
SH385	T	5.41
SH386	T	4.76667
SH387	T	4.78333
SH388	C	5.04
SH389	T	4.92333
SH390	T	4.99
SH391	C	4.58333
SH392	T	5.59333
SH393	C	4.87
SH394	T	5.12
SH395	C	5.42
SH396	T	5.52667
SH397	T	5.22333
SH398	T	5.35667
SH399	T	5.16
SH400	T	4.59667
SH401	T	5.79667
SH402	T	5.43
SH403	C	4.95333
SH404	T	4.51
SH405	C	5.21
SH406	C	5.49667
SH407	C	4.75
SH408	T	4.39
SH409	T	4.50667
SH410	T	4.41
SH411	T	4.81
SH412	T	4.42
SH413	T	5.12333
SH414	T	4.88667
SH415	T	5.01
SH417	T	4.93667
SH418	T	4.75
SH419	C	5.33667
SH421	T	5.24
SH422	T	5.14
SH423	T	4.99
SH424	C	5.36
SH425	T	4.62
SH426	T	4.81667
SH427	T	5.00333
SH428	T	5.34333
SH429	T	4.96
SH430	C	5.22
SH434	T	5.59667
SH435	T	4.99333
SH436	T	5.10667
SH437	T	5.17
SH438	T	4.72
SH440	T	4.82
SH441	T	5.04333
SH442	T	4.96333
SH443	T	4.81667
SH444	T	4.74667
SH445	T	5.12
SH446	T	4.82667
SH447	T	4.64667

## Sheet: Table S8 Candidate gene and RS
Table S8 Effect of candidate gene alleles on RS content in the association population
peak SNP	Alleles			Variety Number			t-test
AX_94546744	C	T	Y	C	T	Y	C-T	C-Y	T-Y
TraesCS4D03G0004500	3.58	5.44	4	26	25	152	1.40614e-07		3.22519e-07
TraesCS4D03G0000900	2.8754	3.89389	4.13651	26	25	152	0.00563414	0.000152126
TraesCS4D03G0002900	25.7885	35.2281	37.3496	26	25	152	0.0487417		0.00238439
TraesCS4D03G0000200	11.7653	8.7485	9.12311	26	25	152	0.00306827		0.0069267
TraesCS4D03G0010800	4.07333	5.70033	4.08747	26	25	152	0.00512883		0.00427714
TraesCS4D03G0020900	5.12893	4.38826	5.1129	26	25	152			0.0113648
TraesCS4D03G0020600	29.8883	30.3948	35.2133	26	25	152		0.0213996	0.043396
TraesCS4D03G0003800	2.38461	2.82292	2.77133	26	25	152		0.0278045
TraesCS4D03G0011700	52.5031	43.8219	48.286	26	25	152	0.0382855
TraesCS4D03G0019600	5.81644	8.23909	8.49327	26	25	152		0.0409131
peak SNP	Alleles			Variety Number			t-test
AX_108969238	C	T	Y	C	T	Y	C-T	C-Y	T-Y
TraesCS5A03G0943300	24.173	22.676	6.0604	149	55	3		0.0262217	0.0246859
TraesCS5A03G0943900	8.92651	9.70024		149	55	3	0.0228361
TraesCS5A03G0944000	1.88217	2.33552		149	55	3	0.0126265
TraesCS5A03G0944100	2.98618	3.34589		149	55	3	0.00867865
TraesCS5A03G0945600	3.96315	3.25845		149	55	3	3.19143e-06
TraesCS5A03G0948900	4.86708	4.79299	3.60023	149	55	3		0.000486158	0.000126406
TraesCS5A03G0949900	3.89698	3.18909	0.833188	149	55	3		0.00395513	0.00732205
TraesCS5A03G0950100	6.45175	8.67694		149	55	3	9.37306e-05
TraesCS5A03G0952000	3.24503	2.52714	2.00969	149	55	3	0.00960457	0.0179367
TraesCS5A03G0952600	33.2641	36.2456		149	55	3	0.0225051
TraesCS5A03G0953300	17.604	31.9315	17.5219	149	55	3	4.25911e-11		0.000287473
TraesCS5A03G0955600	14.6549	15.6883		149	55	3	0.0440757
TraesCS5A03G0956400	4.08463	4.05445	5.13447	149	55	3		0.0182002	0.00582654
TraesCS5A03G0956900	16.6792	19.2705		149	55	3	0.0143395
TraesCS5A03G0957400	11.3347	13.528		149	55	3	1.74278e-06
TraesCS5A03G0958000	1.01305	1.41001		149	55	3	0.0243354
TraesCS5A03G0958500	0.862628	1.0685		149	55	3	0.0208538
TraesCS5A03G0958900	19.2677	22.1818		149	55	3	0.00178179
TraesCS5A03G0959100		3.25358	1.05953	149	55	3			0.0486699
TraesCS5A03G0960300	2.58352	3.46859		149	55	3	4.62742e-09
TraesCS5A03G0960400	0.888171	0.695328		149	55	3	0.00578452
TraesCS5A03G0963000	0.955454	1.73359		149	55	3	5.80411e-14
TraesCS5A03G0963300	2.21005	1.56774		149	55	3	0.0009786
TraesCS5A03G0965300	113.239	124.559		149	55	3	0.00272497
TraesCS5A03G0967400	29.9177		27.0262	149	55	3		0.0246545
TraesCS5A03G0967900	10.8874	10.1545	14.4127	149	55	3		0.028317	0.0153383
TraesCS5A03G0969000	1.15235		1.00876	149	55	3		4.76762e-05
TraesCS5A03G0969000		1.16505	1.00876	149	55	3			0.0110994
TraesCS5A03G0971200	14.0271		10.8474	149	55	3		0.0426656
TraesCS5A03G0975200	1.10513	1.06271	1.61238	149	55	3		9.56382e-07	5.33713e-08
peak SNP	Alleles			Variety Number			t-test
AX_109448373	A	G	R	A	G	R	A-G	A-R	G-R
TraesCS5A03G0031900	4.02177	4.78883	4.83088	43	59	102	0.0387004	0.0181211
TraesCS5A03G0016200		1.8128	2.39097	43	59	102			0.0132129
TraesCS5A03G0018600	3.34143	2.89089	2.91786	43	59	102	0.011698	0.0101433
TraesCS5A03G0019300	10.7275	11.9549		43	59	102	0.0171387
TraesCS5A03G0020900	1.27907	0.836633		43	59	102	0.0110166
TraesCS5A03G0021600	1.61356	0.879399	1.00495	43	59	102	4.67209e-08	2.19401e-06
TraesCS5A03G0022300	1.95309	1.61698		43	59	102	0.0417266
TraesCS5A03G0022400	0.601253	0.333082	0.425833	43	59	102	0.000347267	0.0261051
TraesCS5A03G0023200	1.8049		2.15094	43	59	102		0.0176997
TraesCS5A03G0023300	8.23734	7.66011	7.06981	43	59	102		0.00235641	0.0258253
TraesCS5A03G0023900	2.04066	1.59544		43	59	102	0.022739
TraesCS5A03G0025300	3.62098	3.15722		43	59	102	0.0435
TraesCS5A03G0030600	1.65868	1.37279		43	59	102	0.0378538
TraesCS5A03G0032300	1.87022	2.36267		43	59	102	0.0158467
TraesCS5A03G0032700	4.50074	2.77465	2.9128	43	59	102	8.18434e-09	1.07569e-09
TraesCS5A03G0035400	1.05609	0.82311		43	59	102	0.00462158
TraesCS5A03G0035600	3.85202	3.36405		43	59	102	0.0199604
peak SNP	Alleles			Variety Number			t-test
AX_110371230	A	G	R	A	G	R	A-G	A-R	G-R
TraesCS2A03G1236800	0.827132	1.09756		41	159	6	0.00889521
TraesCS2A03G1246800	10.5244	22.7406		41	159	6	2.67741e-06
TraesCS2A03G1251900	4.27652	3.33227	2.6983	41	159	6	0.000251194	0.0230113
TraesCS2A03G1253700	2.90503	2.27429	1.33495	41	159	6	0.0357009	0.0441282
TraesCS2A03G1253800	14.3164	15.9721	11.1616	41	159	6		0.0110485	0.000307298
TraesCS2A03G1259700	1.68944	1.19374	0.673364	41	159	6	0.0170167	0.0134234
TraesCS2A03G1263100	11.2704	8.63619		41	159	6	0.0468324
TraesCS2A03G1263400	6.94824	5.58223	4.66962	41	159	6	0.000149869	0.00459748
TraesCS2A03G1263500	35.298		28.8094	41	159	6		0.0498033
TraesCS2A03G1264000	20.1044	14.3892	8.09286	41	159	6		0.00908435	0.0314795
TraesCS2A03G1264100	26.5964		21.0923	41	159	6		0.018211
TraesCS2A03G1264200	3.44382	2.51182	1.61474	41	159	6	3.95129e-05	2.96384e-06	0.00416068
TraesCS2A03G1266300	9.84645	12.0284		41	159	6	0.00608526
TraesCS2A03G1271900	8.64003		6.51528	41	159	6		0.0277379
TraesCS2A03G1274800	0.989513	0.695779	0.561125	41	159	6	0.0162507	0.0196275
TraesCS2A03G1274900	5.05961	3.67521	3.28258	41	159	6	2.17555e-05	0.0087653
TraesCS2A03G1275200	2.85778	3.13026		41	159	6	0.0436326
TraesCS2A03G1278800	33.4174	29.3532		41	159	6	0.0207647
TraesCS2A03G1280900	9.72941		8.12527	41	159	6		0.0174715
peak SNP	Alleles			Variety Number			t-test
AX_111564575	C	T	Y	C	T	Y	C-T	C-Y	T-Y
TraesCS2A03G1353600	1.46656	0.687769		36	162	6	5.81141e-05
TraesCS2A03G1350700	4.0948	2.64418		36	162	6	0.00196818
TraesCS2A03G1348500		5.54964	10.0156	36	162	6			0.0340204
TraesCS2A03G1345300	4.83684	4.89665	9.9158	36	162	6		0.0364184	0.0381139
TraesCS2A03G1344900	1.36857	1.48547	2.61397	36	162	6		0.0167901	0.025273
TraesCS2A03G1338300	24.6013	24.561	39.199	36	162	6		0.0455031	0.0454659
TraesCS2A03G1337300	3.07474	4.56439	4.31691	36	162	6	0.00297438	0.0142069
TraesCS2A03G1335500	14.3036	7.00989		36	162	6	0.00235919
TraesCS2A03G1330600	2.42903	2.70015	4.1636	36	162	6		0.0216405	0.041389
TraesCS2A03G1330500	3.72485	4.04419	5.42425	36	162	6		0.0210292	0.0459197
TraesCS2A03G1330000	0.590874	0.835431		36	162	6	0.00480755
TraesCS2A03G1328200	28.6728	22.8822	41.8514	36	162	6	0.0111429		0.0168535
TraesCS2A03G1324400	6.44854	7.54858	12.1008	36	162	6		0.00162542	0.00648071
TraesCS2A03G1324300	3.92371		6.82775	36	162	6		0.031628
TraesCS2A03G1320000	5.02471		7.96554	36	162	6		0.0266194
peak SNP	Alleles			Variety Number			t-test
AX_94833369	C	Y		C	Y		C-Y
TraesCS4A03G0764800	5.86001	5.36184		179	28		0.018683
TraesCS4A03G0780600	12.2672	10.4061		179	28		0.0386389
TraesCS4A03G0788500	5.10208	4.45585		179	28		0.0447039
peak SNP	Alleles			Variety Number			t-test
AX_94853365	C	S		C	S		C-S
TraesCS3A03G1213000	3.52438	2.37316		167	39		4.35329e-05
TraesCS3A03G1223400	2.93802	3.69787		167	39		0.00418246
TraesCS3A03G1214700	1.80983	2.37696		167	39		0.00491468
peak SNP	Alleles			Variety Number			t-test
AX_95258478	A	R		A	R		A-R
TraesCS2B03G0276500	1.25595	0.322112		182	25		9.30296e-16
TraesCS2B03G0276600	2.25701	0.492347		182	25		5.91647e-10
TraesCS2B03G0271500	1.94314	2.81637		182	25		0.000101353
TraesCS2B03G0276000	3.6774	1.43666		182	25		0.000322636
TraesCS2B03G0273100	74.1569	65.1636		182	25		0.00497658
TraesCS2B03G0284600	14.5129	12.3778		182	25		0.0277484
peak SNP	Alleles			Variety Number			t-test
AX_110545722	A	G		A	G		A-G
TraesCS5B03G0978400	2.87793	1.72526		109	98		8.22153e-20
TraesCS5B03G0982100	24.0089	9.41543		109	98		1.80677e-08
TraesCS5B03G0983500	7.99321	10.2273		109	98		3.86012e-06
TraesCS5B03G0978600	1.26289	0.875771		109	98		9.20683e-06
TraesCS5B03G0982000	0.874809	0.576201		109	98		1.05428e-05
TraesCS5B03G0977000	11.2691	10.1673		109	98		0.000283285
TraesCS5B03G0973900	2.5936	2.27196		109	98		0.00277967
TraesCS5B03G0979500	5.17047	4.46626		109	98		0.00398894
TraesCS5B03G0974900	0.973783	1.21631		109	98		0.00541588
TraesCS5B03G0973000	13.036	11.8446		109	98		0.00551772
TraesCS5B03G0990600	0.496645	0.227983		109	98		0.00723898
TraesCS5B03G0983100	7.32789	8.26441		109	98		0.0105654
TraesCS5B03G0989800	0.410348	0.277984		109	98		0.0160414
TraesCS5B03G0981900	5.90682	6.47141		109	98		0.0177466
TraesCS5B03G0981700	2.87363	1.82909		109	98		0.0189364
TraesCS5B03G0984200	1.48685	1.15708		109	98		0.0319516
TraesCS5B03G0983300	7.87826	7.50955		109	98		0.0354192
peak SNP	Alleles			Variety Number			t-test
AX_110911991	A	G		A	G		A-G
TraesCS2A03G1034500	9.44322	22.4613		157	49		4.04361e-17
TraesCS2A03G1025100	27.1604	25.6875		157	49		0.0137191
TraesCS2A03G1019500	2.60999	2.3748		157	49		0.0149675
TraesCS2A03G1018400	5.44779	5.77009		157	49		0.0205666
TraesCS2A03G1030400	76.5673	69.287		157	49		0.0479166
peak SNP	Alleles			Variety Number			t-test
AX_111079685	A	G		A	G	R	A-G
TraesCS6A03G1050000	6.59727	1.04848		138	65	2	1.22658e-33
TraesCS6A03G1049000	3.67608	2.28938		138	65	2	1.69162e-15
TraesCS6A03G1045100	0.445315	1.76474		138	65	2	4.71175e-13
TraesCS6A03G1048100	18.3458	13.2302		138	65	2	4.83718e-13
TraesCS6A03G1050800	5.02748	3.67953		138	65	2	6.34415e-13
TraesCS6A03G1048200	8.19478	5.47493		138	65	2	1.55317e-11
TraesCS6A03G1051600	1.54779	0.955222		138	65	2	3.30442e-11
TraesCS6A03G1046800	7.53566	12.6978		138	65	2	6.8192e-11
TraesCS6A03G1046500	14.8506	9.67387		138	65	2	5.61646e-09
TraesCS6A03G1042900	8.54647	11.2186		138	65	2	3.95777e-07
TraesCS6A03G1025300	3.81865	5.82936		138	65	2	1.69669e-06
TraesCS6A03G1045900	0.689572	0.439021		138	65	2	1.54803e-05
TraesCS6A03G1033200	0.350916	0.196262		138	65	2	3.17545e-05
TraesCS6A03G1041200	17.0153	21.7786		138	65	2	0.000124632
TraesCS6A03G1051300	6.76468	7.51624		138	65	2	0.000164165
TraesCS6A03G1042700	2.06702	2.6864		138	65	2	0.00109575
TraesCS6A03G1027000	2.0567	2.59194		138	65	2	0.00192416
TraesCS6A03G1026400	3.88951	4.56363		138	65	2	0.00694917
TraesCS6A03G1023700	1.80512	2.38635		138	65	2	0.0148127
TraesCS6A03G1043300	3.51841	4.12802		138	65	2	0.0165001
TraesCS6A03G1023600	1.81055	1.60951		138	65	2	0.0197428
TraesCS6A03G1043100	4.51287	4.95468		138	65	2	0.0200776
TraesCS6A03G1026800	18.518	19.845		138	65	2	0.0253818
TraesCS6A03G1040500	21.8025	23.6656		138	65	2	0.0313173
peak SNP	Alleles			Variety Number			t-test
AX_111140336	C	T		C	T		C-T
TraesCS7B03G0152000	37.4406	28.5558		146	59		3.64731e-06
TraesCS7B03G0162100	10.1368	11.1847		146	59		2.67231e-05
TraesCS7B03G0149600	8.92344	12.8924		146	59		5.33041e-05
TraesCS7B03G0152500	1.76877	2.12168		146	59		0.000223851
TraesCS7B03G0166400	75.8977	83.5936		146	59		0.000562477
TraesCS7B03G0151400	124.896	177.826		146	59		0.00109211
TraesCS7B03G0148800	4.84855	6.43923		146	59		0.00129992
TraesCS7B03G0162000	1.28306	1.15414		146	59		0.0275649
TraesCS7B03G0149800	13.0308	11.7851		146	59		0.049231
peak SNP	Alleles			Variety Number			t-test
AX_111141477	A	G		A	G	R	A-G
TraesCS2D03G0964200	27.3525	31.4414		80	125	2	5.26484e-06
TraesCS2D03G0984000	4.65675	4.10702		80	125	2	0.00339796
TraesCS2D03G0983000	3.99813	3.5012		80	125	2	0.00890503
TraesCS2D03G0974300	6.14505	5.47662		80	125	2	0.0282757
TraesCS2D03G0978300	42.6325	39.1648		80	125	2	0.0318534
TraesCS2D03G0975000	3.56967	3.24185		80	125	2	0.044438
peak SNP	Alleles			Variety Number			t-test
AX_111838051	C	G		C	G	S	A-G
TraesCS2D03G0941800	6.92382	4.51322		80	125	2	8.06169e-27
TraesCS2D03G0935800	0.823776	4.87374		80	125	2	0.000277003
TraesCS2D03G0927900	2.22101	1.93196		80	125	2	0.00993575
TraesCS2D03G0944200	16.2869	15.2607		80	125	2	0.0149927
TraesCS2D03G0929100	1.14313	1.39924		80	125	2	0.0242687
TraesCS2D03G0940500	1.38327	1.16166		80	125	2	0.0254338
TraesCS2D03G0929800	1.80944	2.21845		80	125	2	0.0376848
